# Supplementary material for: Comprehensive analysis of differentially expressed microRNAs and mRNAs in MDBK cells expressing bovine papillomavirusE5oncogene
Source: PeerJ journal article supplement (doi:10.7717/peerj.8098), 2019-11-22

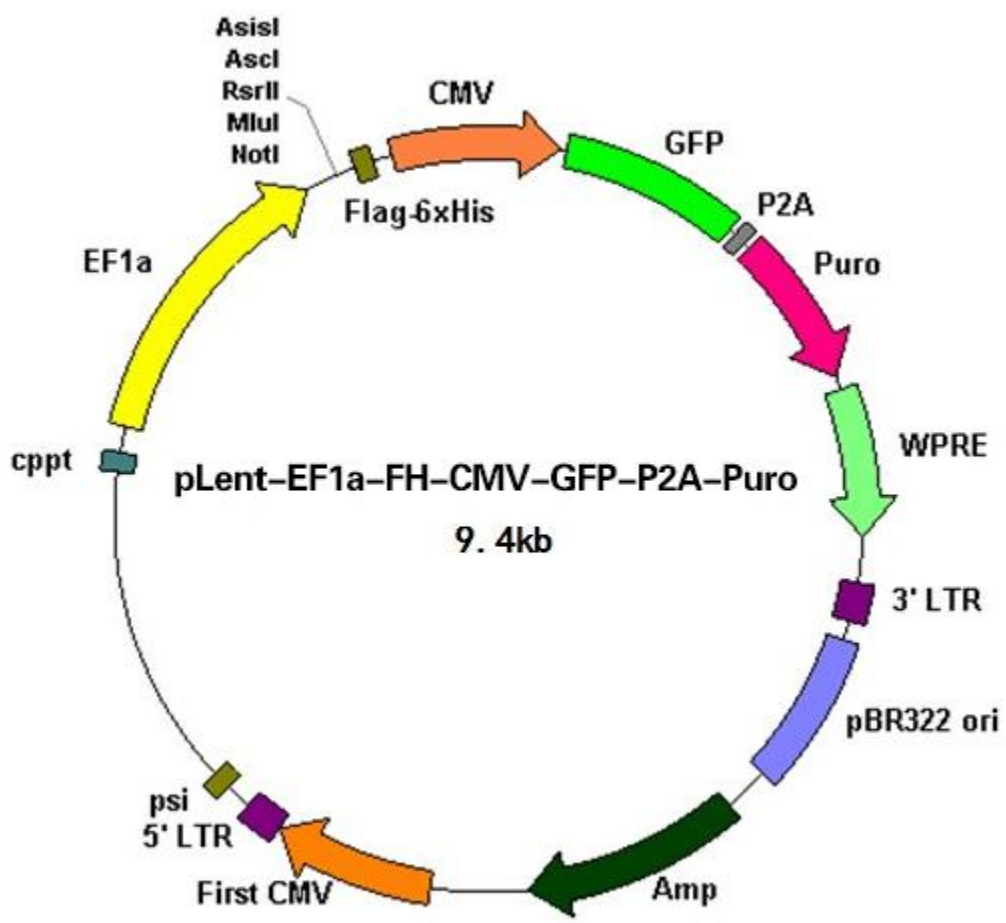

Supplement: Figure_S1.pdf [file Figure_S1.pdf]
