# Supplementary material for: Comprehensive analysis of differentially expressed microRNAs and mRNAs in MDBK cells expressing bovine papillomavirus E5 oncogene
Source: PeerJ. 2019 Nov 22;7:e8098. doi: 10.7717/peerj.8098 (PMC6876490; doi:10.7717/peerj.8098)
Supplement: Supplemental Information 5 [file peerj-07-8098-s005.xlsx]

## Sheet: Sheet1
Table S3.Differentially expressed miRNAs and mRNAs with reverse expression used for constructing miRNA-mRNA regulatory network
miRNA name	miRNA expression（E5 vs GFP)	Transcript name	cor	Symbol	Description
novel-m0115-5p	down	ENSBTAT00000024559	-1	ANKRD37	PREDICTED: ankyrin repeat domain-containing protein 37 isoform X5 [Capra hircus]
novel-m0366-3p	down	ENSBTAT00000018554	-1	PSAT1	PREDICTED: phosphoserine aminotransferase [Vicugna pacos]
novel-m0396-3p	down	ENSBTAT00000018554	-1	PSAT1	PREDICTED: phosphoserine aminotransferase [Vicugna pacos]
miR-6524-y	down	ENSBTAT00000019303	-1	SMIM14	small integral membrane protein 14 [Bos taurus]
novel-m0115-5p	down	ENSBTAT00000019758	-1	SPARC	TPA: SPARC [Bos taurus]
novel-m0366-3p	down	ENSBTAT00000019758	-1	SPARC	TPA: SPARC [Bos taurus]
bta-miR-195	down	ENSBTAT00000064559	-1	LCORL	TPA: ligand dependent nuclear receptor corepressor-like [Bos taurus]
miR-328-y	down	ENSBTAT00000064559	-1	LCORL	TPA: ligand dependent nuclear receptor corepressor-like [Bos taurus]
miR-6937-x	down	ENSBTAT00000064559	-1	LCORL	TPA: ligand dependent nuclear receptor corepressor-like [Bos taurus]
novel-m0231-3p	down	ENSBTAT00000064559	-1	LCORL	TPA: ligand dependent nuclear receptor corepressor-like [Bos taurus]
novel-m0366-3p	down	ENSBTAT00000064559	-1	LCORL	TPA: ligand dependent nuclear receptor corepressor-like [Bos taurus]
bta-miR-449b	down	ENSBTAT00000003991	-1	SC4MOL	PREDICTED: methylsterol monooxygenase 1 [Vicugna pacos]
miR-6524-y	down	ENSBTAT00000003991	-1	SC4MOL	PREDICTED: methylsterol monooxygenase 1 [Vicugna pacos]
miR-328-y	down	ENSBTAT00000032494	-1	MC1R	PREDICTED: melanocyte-stimulating hormone receptor [Bison bison bison]
bta-miR-195	down	ENSBTAT00000023091	-1	GRB7	PREDICTED: LOW QUALITY PROTEIN: growth factor receptor-bound protein 7 [Pantholops hodgsonii]
novel-m0345-3p	down	ENSBTAT00000023091	-1	GRB7	PREDICTED: LOW QUALITY PROTEIN: growth factor receptor-bound protein 7 [Pantholops hodgsonii]
bta-miR-2350	up	ENSBTAT00000034676	-1	AOAH	TPA: acyloxyacyl hydrolase [Bos taurus]
bta-miR-2425-5p	down	ENSBTAT00000025441	-1	PNRC1	TPA: proline-rich nuclear receptor coactivator 1 [Bos taurus]
bta-miR-195	down	ENSBTAT00000001298	-1	KLHDC8B	PREDICTED: kelch domain-containing protein 8B [Vicugna pacos]
novel-m0331-5p	down	ENSBTAT00000001298	-1	KLHDC8B	PREDICTED: kelch domain-containing protein 8B [Vicugna pacos]
bta-miR-677	down	ENSBTAT00000002398	-1	GJA1	PREDICTED: gap junction alpha-1 protein [Vicugna pacos]
miR-6937-x	down	ENSBTAT00000002398	-1	GJA1	PREDICTED: gap junction alpha-1 protein [Vicugna pacos]
novel-m0345-3p	down	ENSBTAT00000002398	-1	GJA1	PREDICTED: gap junction alpha-1 protein [Vicugna pacos]
bta-miR-195	down	ENSBTAT00000006960	-1	CLDN2	PREDICTED: claudin-2 [Rhinolophus sinicus]
bta-miR-2355-3p	down	ENSBTAT00000006960	-1	CLDN2	PREDICTED: claudin-2 [Rhinolophus sinicus]
bta-miR-338	up	ENSBTAT00000015414	-1	ST3GAL5	TPA: lactosylceramide alpha-2,3-sialyltransferase [Bos taurus]
bta-miR-34c	down	ENSBTAT00000006960	-1	CLDN2	PREDICTED: claudin-2 [Rhinolophus sinicus]
bta-miR-449b	down	ENSBTAT00000006960	-1	CLDN2	PREDICTED: claudin-2 [Rhinolophus sinicus]
miR-219-y	down	ENSBTAT00000006960	-1	CLDN2	PREDICTED: claudin-2 [Rhinolophus sinicus]
novel-m0033-3p	down	ENSBTAT00000006960	-1	CLDN2	PREDICTED: claudin-2 [Rhinolophus sinicus]
novel-m0244-5p	down	ENSBTAT00000006960	-1	CLDN2	PREDICTED: claudin-2 [Rhinolophus sinicus]
bta-miR-143	down	ENSBTAT00000017694	-1	ACSS2	PREDICTED: LOW QUALITY PROTEIN: acetyl-coenzyme A synthetase, cytoplasmic [Bison bison bison]
miR-328-y	down	ENSBTAT00000017694	-1	ACSS2	PREDICTED: LOW QUALITY PROTEIN: acetyl-coenzyme A synthetase, cytoplasmic [Bison bison bison]
miR-7113-y	down	ENSBTAT00000002279	-1	LUM	PREDICTED: lumican [Pteropus vampyrus]
bta-miR-34c	down	ENSBTAT00000015324	-1	MGC157263	solute carrier family 22 member 4-like protein [Camelus ferus]
bta-miR-338	up	ENSBTAT00000024587	-1	IL6R	PREDICTED: interleukin-6 receptor subunit alpha [Vicugna pacos]
miR-2299-y	up	ENSBTAT00000024587	-1	IL6R	PREDICTED: interleukin-6 receptor subunit alpha [Vicugna pacos]
bta-miR-449b	down	ENSBTAT00000024072	-1	QPRT	TPA: nicotinate-nucleotide pyrophosphorylase [Bos taurus]
miR-6524-y	down	ENSBTAT00000024072	-1	QPRT	TPA: nicotinate-nucleotide pyrophosphorylase [Bos taurus]
bta-miR-188	down	ENSBTAT00000029017	-1	CCNG2	PREDICTED: cyclin-G2 [Ursus maritimus]
miR-6937-x	down	ENSBTAT00000029017	-1	CCNG2	PREDICTED: cyclin-G2 [Ursus maritimus]
novel-m0366-3p	down	ENSBTAT00000029017	-1	CCNG2	PREDICTED: cyclin-G2 [Ursus maritimus]
bta-miR-190b	down	ENSBTAT00000018612	-1	ELMOD2	PREDICTED: ELMO domain-containing protein 2 [Ursus maritimus]
bta-miR-2461-3p	down	ENSBTAT00000018612	-1	ELMOD2	PREDICTED: ELMO domain-containing protein 2 [Ursus maritimus]
novel-m0128-5p	up	ENSBTAT00000061091	-1	LRRC16B	PREDICTED: LOW QUALITY PROTEIN: leucine-rich repeat-containing protein 16B [Sus scrofa]
bta-miR-143	down	ENSBTAT00000013284	-1	EGR1	PREDICTED: LOW QUALITY PROTEIN: early growth response protein 1 [Bos mutus]
miR-219-y	down	ENSBTAT00000002357	-1	SYT4	Synaptotagmin-4, partial [Bos mutus]
miR-9270-x	down	ENSBTAT00000013284	-1	EGR1	PREDICTED: LOW QUALITY PROTEIN: early growth response protein 1 [Bos mutus]
novel-m0128-5p	up	ENSBTAT00000013942	-1	FGFR4	PREDICTED: fibroblast growth factor receptor 4 isoform X2 [Ovis aries musimon]
miR-1843-x	down	ENSBTAT00000017392	-1	PSPH	PREDICTED: phosphoserine phosphatase [Tupaia chinensis]
bta-miR-195	down	ENSBTAT00000013689	-1	CHAC1	PREDICTED: LOW QUALITY PROTEIN: cation transport regulator-like protein 1 [Bison bison bison]
bta-miR-188	down	ENSBTAT00000061304	-1	IQCK	PREDICTED: IQ domain-containing protein K [Ursus maritimus]
novel-m0231-3p	down	ENSBTAT00000042846	-1	CCDC69	TPA: coiled-coil domain containing 69 [Bos taurus]
novel-m0234-3p	down	ENSBTAT00000042846	-1	CCDC69	TPA: coiled-coil domain containing 69 [Bos taurus]
bta-miR-195	down	ENSBTAT00000011920	-1	YPEL3	YPEL3 protein, partial [Bos taurus]
bta-miR-195	down	ENSBTAT00000066246	-1	TIEG2	TPA: Kruppel-like factor 11 isoform 2 [Bos taurus]
novel-m0231-3p	down	ENSBTAT00000066246	-1	TIEG2	TPA: Kruppel-like factor 11 isoform 2 [Bos taurus]
novel-m0366-3p	down	ENSBTAT00000066246	-1	TIEG2	TPA: Kruppel-like factor 11 isoform 2 [Bos taurus]
bta-miR-195	down	ENSBTAT00000037192	-1	ESRP1	PREDICTED: epithelial splicing regulatory protein 1 isoform X5 [Sus scrofa]
novel-m0269-3p	down	ENSBTAT00000037192	-1	ESRP1	PREDICTED: epithelial splicing regulatory protein 1 isoform X5 [Sus scrofa]
novel-m0366-3p	down	ENSBTAT00000037192	-1	ESRP1	PREDICTED: epithelial splicing regulatory protein 1 isoform X5 [Sus scrofa]
bta-miR-1291	down	ENSBTAT00000025274	-1	PIK3CD	PREDICTED: phosphatidylinositol 4,5-bisphosphate 3-kinase catalytic subunit delta isoform [Vicugna pacos]
miR-328-y	down	ENSBTAT00000025274	-1	PIK3CD	PREDICTED: phosphatidylinositol 4,5-bisphosphate 3-kinase catalytic subunit delta isoform [Vicugna pacos]
bta-miR-195	down	ENSBTAT00000002838	-1	C14H8orf46	Hydroxyacid-oxoacid transhydrogenase, mitochondrial [Pteropus alecto]
miR-1843-x	down	ENSBTAT00000002838	-1	C14H8orf46	Hydroxyacid-oxoacid transhydrogenase, mitochondrial [Pteropus alecto]
bta-miR-2461-3p	down	ENSBTAT00000010206	-1	SLC1A4	PREDICTED: neutral amino acid transporter A [Vicugna pacos]
miR-7113-y	down	ENSBTAT00000010206	-1	SLC1A4	PREDICTED: neutral amino acid transporter A [Vicugna pacos]
novel-m0223-5p	down	ENSBTAT00000010206	-1	SLC1A4	PREDICTED: neutral amino acid transporter A [Vicugna pacos]
bta-miR-122	down	ENSBTAT00000028016	-1	CTSK	RecName: Full=Cathepsin K; Flags: Precursor
bta-miR-2474	down	ENSBTAT00000002084	-1	INSIG1	PREDICTED: insulin-induced gene 1 protein [Ovis aries musimon]
bta-miR-677	down	ENSBTAT00000013990	-1	SH3BGRL	SH3 domain-binding glutamic acid-rich-like protein [Homo sapiens]
miR-122-x	down	ENSBTAT00000028016	-1	CTSK	RecName: Full=Cathepsin K; Flags: Precursor
miR-2388-x	down	ENSBTAT00000002084	-1	INSIG1	PREDICTED: insulin-induced gene 1 protein [Ovis aries musimon]
miR-7113-y	down	ENSBTAT00000002084	-1	INSIG1	PREDICTED: insulin-induced gene 1 protein [Ovis aries musimon]
novel-m0340-5p	down	ENSBTAT00000002084	-1	INSIG1	PREDICTED: insulin-induced gene 1 protein [Ovis aries musimon]
novel-m0366-3p	down	ENSBTAT00000013990	-1	SH3BGRL	SH3 domain-binding glutamic acid-rich-like protein [Homo sapiens]
miR-2388-x	down	ENSBTAT00000024516	-1	MRRF	ribosome-recycling factor, mitochondrial precursor [Bos taurus]
novel-m0128-5p	up	ENSBTAT00000015898	-1	BATF3	PREDICTED: LOW QUALITY PROTEIN: basic leucine zipper transcriptional factor ATF-like 3 [Orcinus orca]
bta-miR-2425-5p	down	ENSBTAT00000011200	-1	RGS14	Regulator of G-protein signaling 14, partial [Bos mutus]
miR-7113-y	down	ENSBTAT00000011200	-1	RGS14	Regulator of G-protein signaling 14, partial [Bos mutus]
bta-miR-1291	down	ENSBTAT00000011801	-1	ACAD10	PREDICTED: acyl-CoA dehydrogenase family member 10 [Orcinus orca]
bta-miR-143	down	ENSBTAT00000026724	-1	TXNIP	thioredoxin-interacting protein [Sus scrofa]
bta-miR-195	down	ENSBTAT00000011801	-1	ACAD10	PREDICTED: acyl-CoA dehydrogenase family member 10 [Orcinus orca]
bta-miR-195	down	ENSBTAT00000026724	-1	TXNIP	thioredoxin-interacting protein [Sus scrofa]
bta-miR-2461-3p	down	ENSBTAT00000016953	-1	GCNT1	PREDICTED: LOW QUALITY PROTEIN: beta-1,3-galactosyl-O-glycosyl-glycoprotein beta-1,6-N-acetylglucosaminyltransferase [Vicugna pacos]
bta-miR-486	down	ENSBTAT00000026724	-1	TXNIP	thioredoxin-interacting protein [Sus scrofa]
miR-486-x	down	ENSBTAT00000026724	-1	TXNIP	thioredoxin-interacting protein [Sus scrofa]
miR-6524-y	down	ENSBTAT00000016953	-1	GCNT1	PREDICTED: LOW QUALITY PROTEIN: beta-1,3-galactosyl-O-glycosyl-glycoprotein beta-1,6-N-acetylglucosaminyltransferase [Vicugna pacos]
miR-6937-x	down	ENSBTAT00000016953	-1	GCNT1	PREDICTED: LOW QUALITY PROTEIN: beta-1,3-galactosyl-O-glycosyl-glycoprotein beta-1,6-N-acetylglucosaminyltransferase [Vicugna pacos]
novel-m0033-3p	down	ENSBTAT00000016953	-1	GCNT1	PREDICTED: LOW QUALITY PROTEIN: beta-1,3-galactosyl-O-glycosyl-glycoprotein beta-1,6-N-acetylglucosaminyltransferase [Vicugna pacos]
novel-m0366-3p	down	ENSBTAT00000026724	-1	TXNIP	thioredoxin-interacting protein [Sus scrofa]
miR-1843-x	down	ENSBTAT00000019737	-1	SLC7A7	Y+L amino acid transporter 1 [Bos taurus]
bta-miR-2448-3p	down	ENSBTAT00000008631	-1	SEC22C	vesicle-trafficking protein SEC22c [Sus scrofa]
bta-miR-34c	down	ENSBTAT00000011801	-1	ACAD10	PREDICTED: acyl-CoA dehydrogenase family member 10 [Orcinus orca]
bta-miR-449b	down	ENSBTAT00000011801	-1	ACAD10	PREDICTED: acyl-CoA dehydrogenase family member 10 [Orcinus orca]
miR-6937-x	down	ENSBTAT00000023694	-1	IRF8	PREDICTED: interferon regulatory factor 8 [Physeter catodon]
novel-m0396-3p	down	ENSBTAT00000023694	-1	IRF8	PREDICTED: interferon regulatory factor 8 [Physeter catodon]
bta-miR-195	down	ENSBTAT00000001299	-1	KLHDC8B	rCG25743, isoform CRA_a [Rattus norvegicus]
novel-m0331-5p	down	ENSBTAT00000001299	-1	KLHDC8B	rCG25743, isoform CRA_a [Rattus norvegicus]
bta-miR-188	down	ENSBTAT00000011514	-1	DR1	protein Dr1 [Rattus norvegicus]
bta-miR-486	down	ENSBTAT00000011514	-1	DR1	protein Dr1 [Rattus norvegicus]
miR-486-x	down	ENSBTAT00000011514	-1	DR1	protein Dr1 [Rattus norvegicus]
bta-miR-143	down	ENSBTAT00000029529	-1	CCDC42B	PREDICTED: LOW QUALITY PROTEIN: coiled-coil domain-containing protein 42B [Pantholops hodgsonii]
bta-miR-143	down	ENSBTAT00000000046	-1	PYCR1	Pyrroline-5-carboxylate reductase 1, mitochondrial, partial [Bos mutus]
bta-miR-195	down	ENSBTAT00000014560	-1	TUBB4A	tubulin beta-4A chain isoform 3 [Homo sapiens]
bta-miR-2355-3p	down	ENSBTAT00000031443	-1	DCSTAMP	Transmembrane 7 superfamily member 4, partial [Bos mutus]
bta-miR-34c	down	ENSBTAT00000000046	-1	PYCR1	Pyrroline-5-carboxylate reductase 1, mitochondrial, partial [Bos mutus]
bta-miR-449b	down	ENSBTAT00000000046	-1	PYCR1	Pyrroline-5-carboxylate reductase 1, mitochondrial, partial [Bos mutus]
miR-1843-x	down	ENSBTAT00000000046	-1	PYCR1	Pyrroline-5-carboxylate reductase 1, mitochondrial, partial [Bos mutus]
miR-2388-x	down	ENSBTAT00000031443	-1	DCSTAMP	Transmembrane 7 superfamily member 4, partial [Bos mutus]
miR-744-y	down	ENSBTAT00000031443	-1	DCSTAMP	Transmembrane 7 superfamily member 4, partial [Bos mutus]
novel-m0223-5p	down	ENSBTAT00000031443	-1	DCSTAMP	Transmembrane 7 superfamily member 4, partial [Bos mutus]
novel-m0331-5p	down	ENSBTAT00000000046	-1	PYCR1	Pyrroline-5-carboxylate reductase 1, mitochondrial, partial [Bos mutus]
novel-m0396-3p	down	ENSBTAT00000031443	-1	DCSTAMP	Transmembrane 7 superfamily member 4, partial [Bos mutus]
bta-miR-195	down	ENSBTAT00000017715	-1	TSPAN1	tetraspanin-1 [Microcebus murinus]
bta-miR-2461-3p	down	ENSBTAT00000017715	-1	TSPAN1	tetraspanin-1 [Microcebus murinus]
miR-1304-y	up	ENSBTAT00000012311	-1	EVI2A	protein EVI2A precursor [Bos taurus]
bta-miR-338	up	ENSBTAT00000025111	-1	EIF4E3	PREDICTED: eukaryotic translation initiation factor 4E type 3 [Ursus maritimus]
bta-miR-34c	down	ENSBTAT00000000187	-1	DDIT4	PREDICTED: DNA damage-inducible transcript 4 protein [Ursus maritimus]
bta-miR-449b	down	ENSBTAT00000000187	-1	DDIT4	PREDICTED: DNA damage-inducible transcript 4 protein [Ursus maritimus]
miR-744-y	down	ENSBTAT00000000187	-1	DDIT4	PREDICTED: DNA damage-inducible transcript 4 protein [Ursus maritimus]
bta-miR-122	down	ENSBTAT00000021459	-1	PACSIN1	protein kinase C and casein kinase substrate in neurons protein 1 [Bos taurus]
bta-miR-2425-5p	down	ENSBTAT00000021459	-1	PACSIN1	protein kinase C and casein kinase substrate in neurons protein 1 [Bos taurus]
miR-122-x	down	ENSBTAT00000021459	-1	PACSIN1	protein kinase C and casein kinase substrate in neurons protein 1 [Bos taurus]
miR-6937-x	down	ENSBTAT00000021459	-1	PACSIN1	protein kinase C and casein kinase substrate in neurons protein 1 [Bos taurus]
miR-7113-y	down	ENSBTAT00000021459	-1	PACSIN1	protein kinase C and casein kinase substrate in neurons protein 1 [Bos taurus]
novel-m0033-3p	down	ENSBTAT00000008883	-1	DBP	PREDICTED: D site-binding protein [Saimiri boliviensis boliviensis]
novel-m0256-5p	down	ENSBTAT00000021459	-1	PACSIN1	protein kinase C and casein kinase substrate in neurons protein 1 [Bos taurus]
novel-m0340-5p	down	ENSBTAT00000021459	-1	PACSIN1	protein kinase C and casein kinase substrate in neurons protein 1 [Bos taurus]
novel-m0396-3p	down	ENSBTAT00000021459	-1	PACSIN1	protein kinase C and casein kinase substrate in neurons protein 1 [Bos taurus]
bta-miR-2425-5p	down	ENSBTAT00000042695	-1	PECAM1	TPA: platelet endothelial cell adhesion molecule precursor [Bos taurus]
novel-m0345-3p	down	ENSBTAT00000042695	-1	PECAM1	TPA: platelet endothelial cell adhesion molecule precursor [Bos taurus]
miR-6524-y	down	ENSBTAT00000028855	-1	GAS2	PREDICTED: LOW QUALITY PROTEIN: growth arrest-specific protein 2 [Pongo abelii]
novel-m0231-3p	down	ENSBTAT00000023746	-1	YPEL1	protein yippee-like 1-like [Scleropages formosus]
bta-miR-677	down	ENSBTAT00000013306	-1	ARL6	PREDICTED: ADP-ribosylation factor-like protein 6 [Sorex araneus]
miR-151-x	up	ENSBTAT00000044945	-1	PUSL1	tRNA pseudouridine synthase-like 1, partial [Bos mutus]
novel-m0269-3p	down	ENSBTAT00000013306	-1	ARL6	PREDICTED: ADP-ribosylation factor-like protein 6 [Sorex araneus]
novel-m0345-3p	down	ENSBTAT00000013306	-1	ARL6	PREDICTED: ADP-ribosylation factor-like protein 6 [Sorex araneus]
novel-m0353-5p	up	ENSBTAT00000044945	-1	PUSL1	tRNA pseudouridine synthase-like 1, partial [Bos mutus]
bta-miR-2448-3p	down	ENSBTAT00000048333	-1	FGF13	PREDICTED: LOW QUALITY PROTEIN: fibroblast growth factor 13 [Equus caballus]
miR-1843-x	down	ENSBTAT00000048333	-1	FGF13	PREDICTED: LOW QUALITY PROTEIN: fibroblast growth factor 13 [Equus caballus]
